# Supplementary material for: PI3Kγ promotes neutrophil extracellular trap formation by noncanonical pyroptosis in abdominal aortic aneurysm
Source: PubMed Central journal article supplement (PMC11343590; doi:10.1172/jci.insight.183237), 2024-07-18

Supplemental information

**PI3K $\gamma$  promotes neutrophil extracellular trap formation by  
noncanonical pyroptosis in abdominal aortic aneurysm**

Yacheng Xiong\*, Shuai Liu, Yu Liu, Jiani Zhao, Jinjian Sun, Yongqing Li, Baihong Pan<sup>#</sup>, Wei Wang<sup>#</sup>

**#Corresponding to:** Wei Wang, weiwangcsu@csu.edu.cn

Baihong Pan, pbh1990s@126.com

**This supplementary information includes:**

**Part I: Supplemental Tables**

**Table S1:** The key reagent and resource used in the present study.

**Table S2:** The patient clinical information in the present study.

**Table S3:** The primer sequences used in the present study.

**Part II: Supplemental Figures**

**Figure S1:** Construction strategies and identification of PI3K $\gamma$  knockout (*PI3K $\gamma$ <sup>-/-</sup>*) mice.

**Figure S2:** PI3K $\gamma$  knockout reduces arterial wall damage and inflammation.

**Figure S3:** Purity isolated neutrophils from mice marrow stimulated by different

concentration of LPS.

**Figure S4:** Pharmacological inhibition of PI3K $\gamma$  reduces NETs formation in neutrophils.

**Figure S5:** The inhibitory effect of PI3K $\gamma$  deficiency on NET formation in neutrophils is independent of ROS signaling.

**Figure S6:** Effects of PI3K $\gamma$  on the NETs formation of neutrophils via the noncanonical pyroptosis signaling pathways.

**Figure S7:** The inhibitory effect of PI3K $\gamma$  deficiency on NETs formation in neutrophils is independent of PI3K/AKT signaling.

**Figure S8:** PI3K $\gamma$  regulates neutrophil noncanonical pyroptosis via cAMP/PKA signaling pathways.

### Supplemental Figures legends

**Figure S1.** Construction strategies and identification of PI3K $\gamma$  knockout (*PI3K $\gamma$ <sup>-/-</sup>*) mice.

(A) PI3K $\gamma$  knockout mice were generated by cutting exon2-exon9 of the *Pik3cg* gene using CRISPR/Cas9 technology.

(B) Genotyping was detected by tail preparation of breeding mice.

(C) Representative western blot images showing PI3K $\gamma$  protein expression in the aorta at different point time after PPE surgery. n=3.

(D) Blood cell counts of WT and PI3K $\gamma$  mice were measured. n=6.

(E) Serum inflammatory factors of WT and PI3K $\gamma$  mice were detected. n=6.

WT, wild type; Heter-, heterozygote; Homo-, homozygote. WBC, white blood cell; Lymph, lymphocytes; Mono, monocytes; Gran, granulosa cells; PLT, platelet; IL1B, interleukin-1 $\beta$ ; IL6, interleukin-6; TNFA, Tumor Necrosis Factor  $\alpha$ ; CCL2, C-C motif chemokine ligand 2.

**Figure S2.** PI3K $\gamma$  knockout reduces arterial wall damage and inflammation.

(A) Representative immunohistochemistry staining images and quantitative comparison of neutrophil infiltration in WT mouse abdominal aorta after PPE-induced AAA. Neutrophil infiltration was assessed by Ly6G<sup>+</sup> neutrophil numbers per high-power field (40X). n=5 in control group and n=6 in AAA group. Scale bars, 50 $\mu$ m.

(B) Representative VVG staining images and quantitative comparison of WT or PI3K $\gamma$ <sup>-/-</sup> mouse abdominal aorta in PPE-induced AAA. n = 6. Scale bars, 50  $\mu$ m.

(C) QPCR analysis of contractile, synthetic, inflammation, and matrix metalloproteinase genes expression normalized to the mean expression of housekeeping gene (*Actb*) in mouse abdominal aorta after PPE-induced AAA. n=6.

(A and B) Two-tailed unpaired student's t test. (C) Two-way ANOVA followed by Bonferroni test.

\* $P < 0.05$ , \*\* $P < 0.01$ , and \*\*\* $P < 0.001$ . AAA, abdominal aorta aneurysm; WT, wild type; PI3K $\gamma$ <sup>-/-</sup>, phosphoinositide 3-kinase  $\gamma$  knockout.

**Figure S3:** Purity isolated neutrophils from mice marrow stimulated by different concentration of LPS.

(A) Representative image of the characteristic morphological appearance of isolated neutrophils stained with Wright-Giemsa stain (40X). Scale bars, 50  $\mu$ m.

(B) Representative image of the characteristic morphological appearance of isolated neutrophils stained with DAPI (40X). Scale bars, 50  $\mu$ m.

(C) Representative scatter plot of isolated neutrophils analyzed by flow cytometry. Neutrophils were identified by double positive staining for CD11b and Ly6G.

(D) Representative western blot images and quantitative comparison of Cit H3 protein expression in isolated neutrophils stimulated with different concentration of LPS. n=3.

(D) One-way ANOVA followed by Bonferroni test.

\* $P$ <0.05, \*\* $P$ <0.01, and \*\*\* $P$ <0.001. Cit H3, citrullinated histone 3; LPS, lipopolysaccharide.

**Figure S4:** Pharmacological inhibition of PI3K $\gamma$  reduces NETs formation in neutrophils.

(A and C) Representative immunofluorescence staining images and quantitative comparison of NETs produced by isolated neutrophils from WT mice with different treatments: PBS, LPS (5 $\mu$ g/mL), LPS + IPI549 (5 $\mu$ M); PBS, TNFa (50ng/mL), TNFa + IPI549 (5 $\mu$ M). NETs were detected using immunofluorescent staining of DNA (DAPI, blue), Citrullinated histone 3 (Cit H3, Green), and Myeloperoxidase (MPO, red). NETs expression was calculated by NETs cell numbers/total cell numbers per high-power field (40X). n=6. Scale bars, 50  $\mu$ m.

(B and D) Representative western blot images and quantitative comparison of Cit H3 protein expression in each group of neutrophils with different treatments as described

in (A) and (C). n=3.

(A-D) One-way ANOVA followed by Fisher's LSD post hoc test.

\* $P < 0.05$ , \*\* $P < 0.01$ , and \*\*\* $P < 0.001$ . PBS, phosphate buffered saline; LPS, Lipopolysaccharide; TNF $\alpha$ , tumor necrosis factor alpha; Cit H3, citrullinated histone 3; NETs, neutrophil extracellular traps.

**Figure S5:** The inhibitory effect of PI3K $\gamma$  deficiency on NET formation in neutrophils is independent of ROS signaling.

(A) Representative western blot images and quantitative comparison of Cit H3 and NOX2 protein expression in the neutrophils with different treatments: PBS (WT-derived neutrophils), LPS (5 $\mu$ g/mL, WT-derived neutrophils), LPS (PI3K $\gamma$ <sup>-/-</sup> derived neutrophil), LPS + DPI (10 $\mu$ M, WT-derived neutrophils), LPS + DPI (PI3K $\gamma$ <sup>-/-</sup>-derived neutrophils). n=3.

(B) Representative western blot images and quantitative comparison of Cit H3 and NOX2 protein expression in isolated neutrophils from WT mice with different treatments: PBS, LPS (5 $\mu$ g/mL), LPS + IPI549 (5 $\mu$ M), LPS + DPI (10 $\mu$ M), LPS + DPI + IPI549. n=3.

(A and B) One-way ANOVA followed by Fisher's LSD post hoc test.

\* $P < 0.05$ , \*\* $P < 0.01$ , and \*\*\* $P < 0.001$ . LPS, Lipopolysaccharide; PI3K $\gamma$ <sup>-/-</sup>, phosphoinositide 3-kinase  $\gamma$  knockout; DPI, diphenyleneiodonium chloride; Cit H3, citrullinated histone 3; NOX2, nicotinamide adenine dinucleotide phosphate oxidase 2.

**Figure S6:** Effects of PI3K  $\gamma$  on the NETs formation of neutrophils via the noncanonical pyroptosis signaling pathways.

(A) Representative western blot image and quantitative analysis of GSDMD protein expression in human AAA tissue and adjacent relatively normal abdominal aortic tissue. n = 7.

(B) Representative western blot image and quantitative comparison of the expression of IL-1 $\beta$  and GSDMD in the isolated neutrophils from WT mice with different treatments: PBS, LPS (5 $\mu$ g/mL), LPS + IPI549 (5 $\mu$ M). n=3.

(C) Representative western blot image and quantitative comparison of the expression of Cit H3, IL-1 $\beta$ , GSDMD, Caspase11, and Caspase1 in the isolated neutrophils from WT mice with different treatments: PBS, LPS (100ng/mL), LPS + Nigericin (10 $\mu$ M), LPS + Nigericin + IPI549 (5 $\mu$ M); PBS, Pam3CSK4 (1 $\mu$ g/mL), Pam3CSK4 + tLPS (10 $\mu$ g/mL, transfer LPS), Pam3CSK4 + tLPS + IPI549 (5 $\mu$ M). n=3. Scale bars, 50  $\mu$ m.

(A) Two-tailed paired student's t test. (B and C) One-way ANOVA followed by Fisher's LSD post hoc test.

\* $P$ <0.05, \*\* $P$ <0.01, and \*\*\* $P$ <0.001. Adjacent AA, adjacent abdominal aorta; AAA, abdominal aorta aneurysm; Cit H3, citrullinated histone 3; GSDMD, Gasdermin D; pro-, prosoma; cle-, cleaved; IL-1 $\beta$ , interleukin 1 beta; Casp1, caspase 1; Casp11, caspase11; PBS, phosphate buffered saline; LPS, Lipopolysaccharide; Nig, nigericin; Pam, Pam3CSK4; tLPS, transfer Lipopolysaccharide.

**Figure S7:** The inhibitory effect of PI3K $\gamma$  deficiency on NETs formation in neutrophils

is independent of PI3K/AKT signaling.

(A) Representative western blot images and quantitative comparison of p-AKT, t-AKT and Cit H3 protein expression in the neutrophils with different treatments: PBS (WT-derived neutrophils), LPS (5 $\mu$ g/mL, WT-derived neutrophils), LPS (PI3K $\gamma$ <sup>-/-</sup> derived neutrophil), LPS + SC79 (4 $\mu$ g/mL, PI3K $\gamma$ <sup>-/-</sup> derived neutrophils). n=3.

(B) Representative western blot images and quantitative comparison of p-AKT, t-AKT and Cit H3 protein expression in isolated neutrophils from WT mice with different treatments: PBS, LPS (5 $\mu$ g/mL), LPS + IPI549 (5 $\mu$ M), LPS + IPI549+ SC79 (4 $\mu$ g/mL). n=3.

(A and B) One-way ANOVA followed by Fisher's LSD post hoc test.

\* $P$ <0.05, \*\* $P$ <0.01, and \*\*\* $P$ <0.001. LPS, Lipopolysaccharide; PI3K $\gamma$ <sup>-/-</sup>, phosphoinositide 3-kinase  $\gamma$  knockout; Cit H3, citrullinated histone 3.

**Figure S8:** PI3K $\gamma$  regulates neutrophil noncanonical pyroptosis via cAMP/PKA signaling pathways.

(A) Representative western blot image and quantitative comparison of the expression of Cit H3, GSDMD, and Caspase11 in the isolated neutrophils from WT mice with different treatments: PBS, LPS (5 $\mu$ g/mL), LPS + IPI549 (5 $\mu$ M), LPS + IPI549 + H89 (20 $\mu$ M), LPS + IPI549 + MDL12330A (10 $\mu$ M). n=3.

(B) Representative immunofluorescence staining images and quantitative comparison of NETs produced by neutrophils with different treatments as described in (A). NETs were detected using immunofluorescent staining of DNA (DAPI, blue), Citrullinated

histone 3 (Cit H3, Green), and Myeloperoxidase (MPO, red). NETs expression was calculated by NETs cell numbers/total cell numbers per high-power field (40X). n=6.

Scale bars, 50  $\mu$ m.

(A and B) One-way ANOVA followed by Fisher's LSD post hoc test.

\* $P < 0.05$ , \*\* $P < 0.01$ , and \*\*\* $P < 0.001$ . Cit H3, citrullinated histone 3; GSDMD, Gasdermin D; pro-, prosooma; cle-, cleaved; Casp11, caspase11; PBS, phosphate buffered saline; LPS, Lipopolysaccharide; MDL, MDL12330A; NETs, neutrophil extracellular traps.



Table S1: the key reagent and resource used in the present study.

| Reagent or Resource                                  | Source                       | Identifier      |
|------------------------------------------------------|------------------------------|-----------------|
| <b>Antibodies</b>                                    |                              |                 |
| Rabbit anti-Histone H3 (citrulline R2 + R8 + R17)    | Abcam                        | Cat# ab5103     |
| Mouse anti- PI3-kinase p110 gamma                    | Santa Cruz Biotechnology     | Cat# sc-166365  |
| Rabbit anti-GSDMD                                    | Abcam                        | Cat# ab210070   |
| Rabbit anti-GSDMD                                    | Abcam                        | Cat# ab219800   |
| Rabbit anti-AKT                                      | Abcam                        | Cat# ab179463   |
| Rabbit anti-p-AKT                                    | Abcam                        | Cat# ab192623   |
| Rabbit anti-NOX2                                     | Abclonal                     | Cat# A12430     |
| Rabbit anti-Ly6G                                     | Abclonal                     | Cat# A22270     |
| Rabbit anti-IL-1 $\beta$                             | Abcam                        | Cat# ab254360   |
| Rabbit anti-Caspase11                                | Abcam                        | Cat# ab180673   |
| Rabbit anti-Caspase1                                 | Abclonal                     | Cat# A0964      |
| Goat anti-MPO                                        | R&D                          | Cat# AF3667-SP  |
| Zombie Aqua <sup>TM</sup> dye                        | Biolegend                    | Cat# 423101     |
| TruStain FcX <sup>TM</sup> PLUS (anti-mouse CD16/32) | Biolegend                    | Cat# 156603     |
| Antibody                                             |                              |                 |
| APC anti-mouse Ly-6G                                 | Biolegend                    | Cat# 127613     |
| FITC anti-mouse/human CD11b                          | Biolegend                    | Cat# 101205     |
| Alexa Fluor 594-conjugated donkey anti-goat IgG      | Invitrogen                   | Cat# A32758     |
| Alexa Fluor 488-conjugated donkey anti-rabbit        | Invitrogen                   | Cat# A32790     |
| IgG                                                  |                              |                 |
| Rabbit anti- $\beta$ -Actin                          | Abclonal                     | Cat# AC038      |
| Mouse anti-GAPDH                                     | Abcam                        | Cat# ab181602   |
| <b>Chemicals</b>                                     |                              |                 |
| Precision Plus Protein Dual Color Standards          | Bio-Rad                      | Cat# 1610374    |
| Prestained Protein Marker VII                        | Servicebio                   | Cat# G2087      |
| 100 bp DNA Ladder                                    | Beijing Tsingke Biotech Co., | Cat# TSJ100-100 |

|                                                 |                 |                  |
|-------------------------------------------------|-----------------|------------------|
|                                                 | Ltd.            |                  |
| Sodium citrate-EDTA antigen repair buffer       | Beyotime        | Cat# P0086       |
| Mouse/Rabbit Enhanced Polymer test system       | ZSGB-BIO        | Cat# PV9000      |
| DAB Substrate Kit                               | ZSGB-BIO        | Cat# ZLI-9018    |
| LPS-O111:B4                                     | Sigma-Aldrich   | Cat# L3024       |
| Porcine pancreatic elastase                     | Sigma-Aldrich   | Cat# E1250       |
| Opti-MEM                                        | Gibco           | Cat# 31985070    |
| TNF-alpha                                       | MedChemExpress  | Cat# HY-P7058    |
| IPI549                                          | MedChemExpress  | Cat# HY-100716   |
| Cl-amidine hydrochloride                        | MedChemExpress  | Cat# HY-100574A  |
| Disulfiram                                      | MedChemExpress  | Cat# HY-B0240    |
| Diphenyleneiodonium chloride                    | MedChemExpress  | Cat# HY-100965   |
| Pam3CSK4                                        | MedChemExpress  | Cat# HY-1        |
| Nigericin                                       | MedChemExpress  | Cat# HY-1        |
| SC79                                            | MedChemExpress  | Cat# HY-18749    |
| H89                                             | MedChemExpress  | Cat# HY-15979    |
| MDL12330A                                       | MedChemExpress  | Cat# HY-1        |
| DOTAP Liposomal Transfection Reagent            | Roche           | Cat# 11202375001 |
| DAPI Fluoromount-G                              | Southernbiotech | Cat# 0100-20     |
| 10x Poly-L-lysine Solution                      | Solarbio        | Cat# P2100       |
| RNAiso Plus                                     | Takara          | Cat# 9109        |
| RIPA Lysate                                     | Beyotime        | Cat# P0013B      |
| Protease and phosphatase inhibitor              | Beyotime        | Cat# P1045       |
| SDS-PAGE protein loading buffer                 | Beyotime        | Cat# P0015L      |
| Immobilon Western HRP substrate Luminol Reagent | Millipore       | Cat# WBKLS0500   |
| Wright-Giemsa Stain Solution                    | Solarbio        | Cat# P1020       |

---

**Critical commercial assay**

---

|                                   |                            |               |
|-----------------------------------|----------------------------|---------------|
| TransDirect® Mouse Genotyping Kit | TransGen Biotech Co., Ltd. | Cat# AD501-01 |
|-----------------------------------|----------------------------|---------------|

---

|                                                         |                  |                |
|---------------------------------------------------------|------------------|----------------|
| Verheff's Elastic Stain Kit                             | Abiowell         | Cat# AWI0267b  |
| Hifair® AdvanceFast One-step RT-gDNA Digestion SuperMix | Yeasen           | Cat# 11151ES60 |
| Veterinary fully automatic hematology analyzer          | Mindray          | Cat# BC2800vet |
| Mouse IL1B ELISA Kit                                    | Renjie Biotech   | Cat# RJ16944   |
| Mouse TNFA ELISA Kit                                    | Renjie Biotech   | Cat# RJ17929   |
| Mouse IL6 ELISA Kit                                     | Abclonal         | Cat# RK00008   |
| Mouse CCL2 ELISA Kit                                    | Abclonal         | Cat# RK00381   |
| Mouse cAMP ELISA Kit                                    | Jianglai biotech | Cat# JL13362   |
| PKA Kinase Activity Assay Kit                           | Abcam            | Cat# ab139435  |
| 2X Universal SYBR Green Fast qPCR Mix                   | Abclonal         | Cat# RK21203   |
| Mouse marrow neutrophil isolation kit                   | Solarbio         | Cat# P8550     |

#### Experimental model

|                                 |                                              |              |
|---------------------------------|----------------------------------------------|--------------|
| C57BL/6J mice                   | SPF Hunan SJA Laboratory<br>Animal Co., Ltd. | N/A          |
| PI3K $\gamma$ -KO $^{-/-}$ mice | GemPharmatech Co. Ltd                        | Cat# T009406 |

Table S2: the patient clinical information in the present study. (n=7)

| Patient | Gender | Age | Smoking | Diameter(mm) | HL  | HTN | CAD |
|---------|--------|-----|---------|--------------|-----|-----|-----|
| ID1     | Male   | 72  | no      | 43           | yes | yes | no  |
| ID2     | Female | 63  | no      | 42           | no  | yes | no  |
| ID3     | Male   | 65  | yes     | 89           | yes | no  | no  |
| ID4     | Male   | 64  | yes     | 43           | no  | no  | no  |
| ID5     | Male   | 77  | yes     | 71           | yes | yes | no  |
| ID6     | Male   | 58  | yes     | 40           | no  | yes | yes |
| ID7     | Male   | 22  | no      | 68           | no  | yes | no  |

HL: Hyperlipidemia; HTN: Hypertension; CAD: Coronary artery disease.

Table S3: The primer sequences used in the present study.

| Gene name    | Primer Sequence (5'-3')            |
|--------------|------------------------------------|
| Pik3cg-WT    | Forward: ACGCTGAGCCTTCTCTCCATC     |
|              | Reverse: CCATAACCCTGGAAACAATGGC    |
| Pik3cg-KO    | Forward: GCTGCGCTGCCTTATTAACTTT    |
|              | Reverse: CTGCGAGAGTTAGGGACTCAGGTGT |
| Tagln        | Forward: CCAACAAGGGTCCATCCTACG     |
|              | Reverse: ATCTGGGCGGCCTACATCA       |
| Cnn1         | Forward: GACGGGATCATTCTTTGCGAA     |
|              | Reverse: CCCCACTTGGTAATGGCTTTG     |
| Acta2        | Forward: GTCCCAGACATCAGGGAGTAA     |
|              | Reverse: TCGGATACTTCAGCGTCAGGA     |
| Myh11        | Forward: ATGAGGTGGTCGTGGAGTTG      |
|              | Reverse: GCCTGAGAAGTATCGCTCCC      |
| Klf4         | Forward: GTGCCCCGACTAACCGTTG       |
|              | Reverse: GTCGTTGAACTCCTCGGTCT      |
| Spp1         | Forward: AGCAAGAACTCTTCCAAGCAA     |
|              | Reverse: GTGAGATTCGTCAGATTCATCCG   |
| IL6          | Forward: TACCACTTCACAAGTCGGAGGC    |
|              | Reverse: CTGCAAGTGCATCATCGTTGTTG   |
| Ccl2         | Forward: GCTACAAGAGGATCACCAGCAG    |
|              | Reverse: GTCTGGACCCATTCTTCTTGG     |
| TNF alpha    | Forward: CAGGCGGTGCCTATGTCTC       |
|              | Reverse: CGATCACCCCGAAGTTCAGTAG    |
| IL-1 $\beta$ | Forward: GAAATGCCACCTTTTGACAGTG    |
|              | Reverse: TGGATGCTCTCATCAGGACAG     |
| Mmp2         | Forward: ACCTGAACACTTTCTATGGCTG    |
|              | Reverse: CTTCCGCATGGTCTCGATG       |
| Mmp9         | Forward: GCAGAGGCATACTTGTACCG      |
|              | Reverse: TGATGTTATGATGGTCCCCTTG    |

---

Actb

Forward: GTGCTATGTTGCTCTAGACTTCG

Reverse: ATGCCACAGGATTCCATACC

---

Figure S1

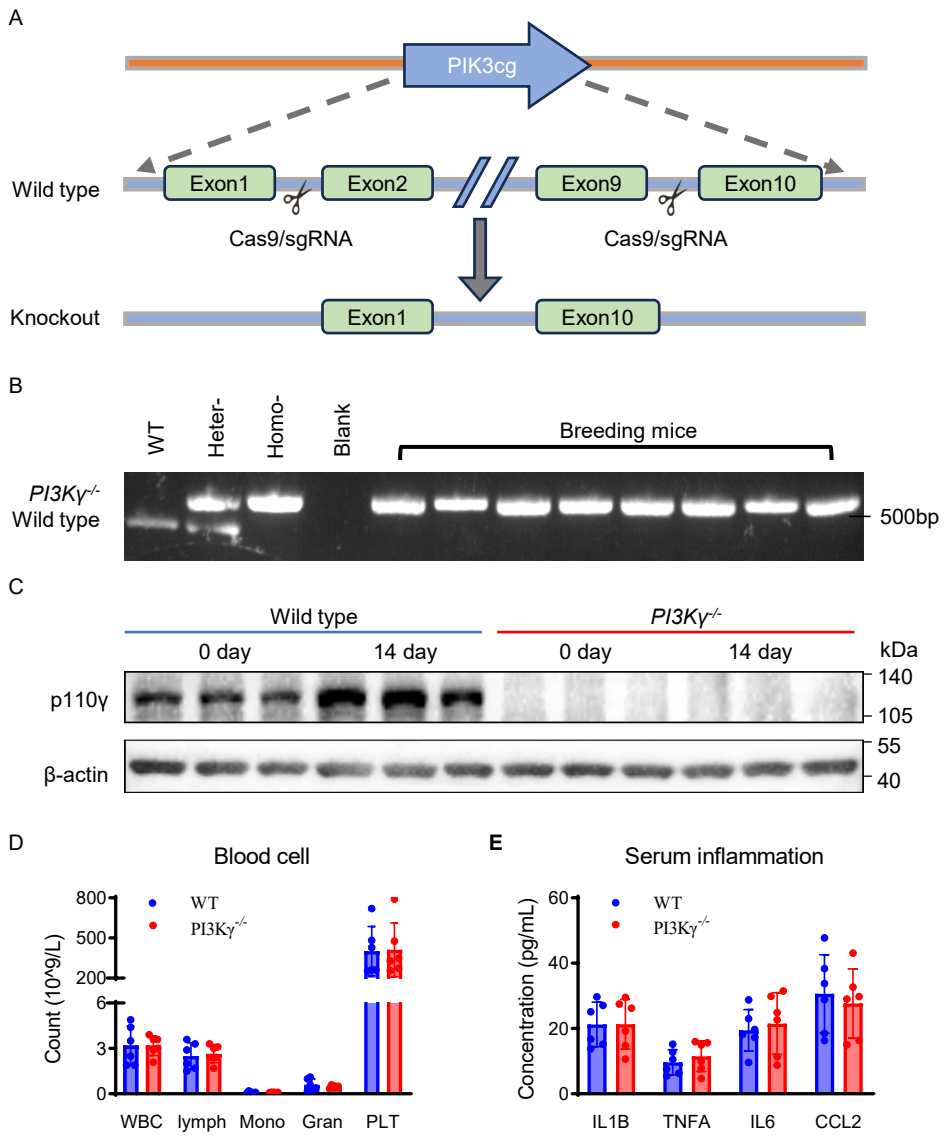

Figure S2

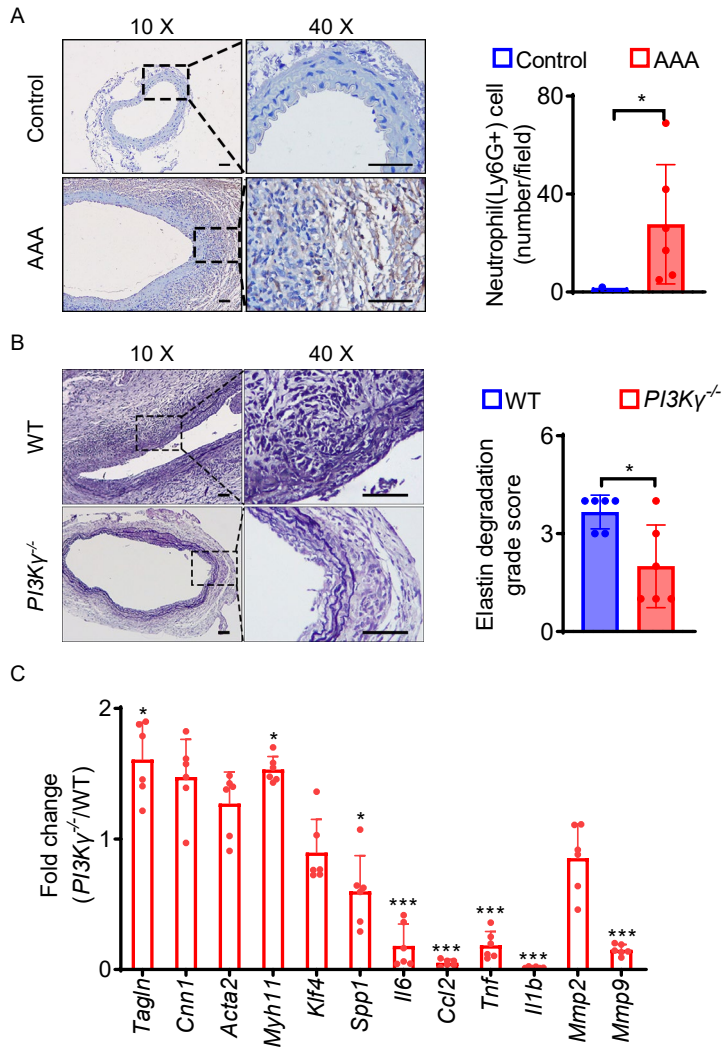

Figure S3

A

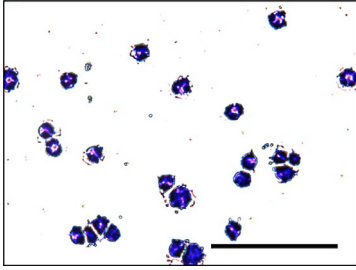

C

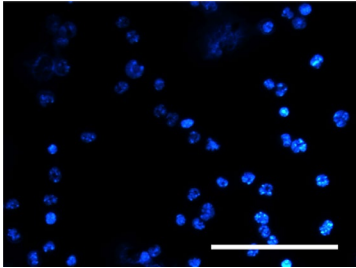

B

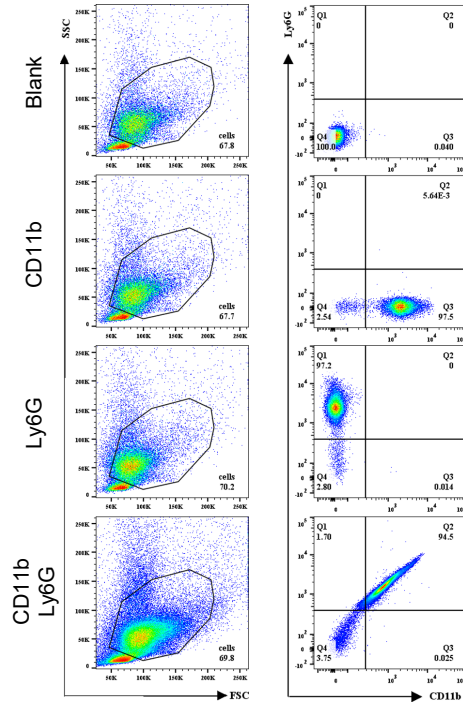

D

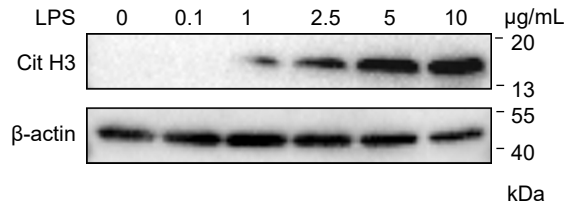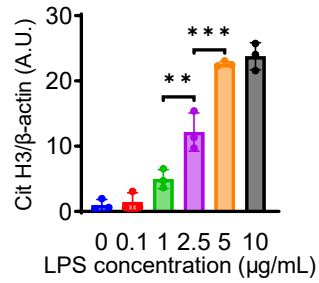



Figure S4

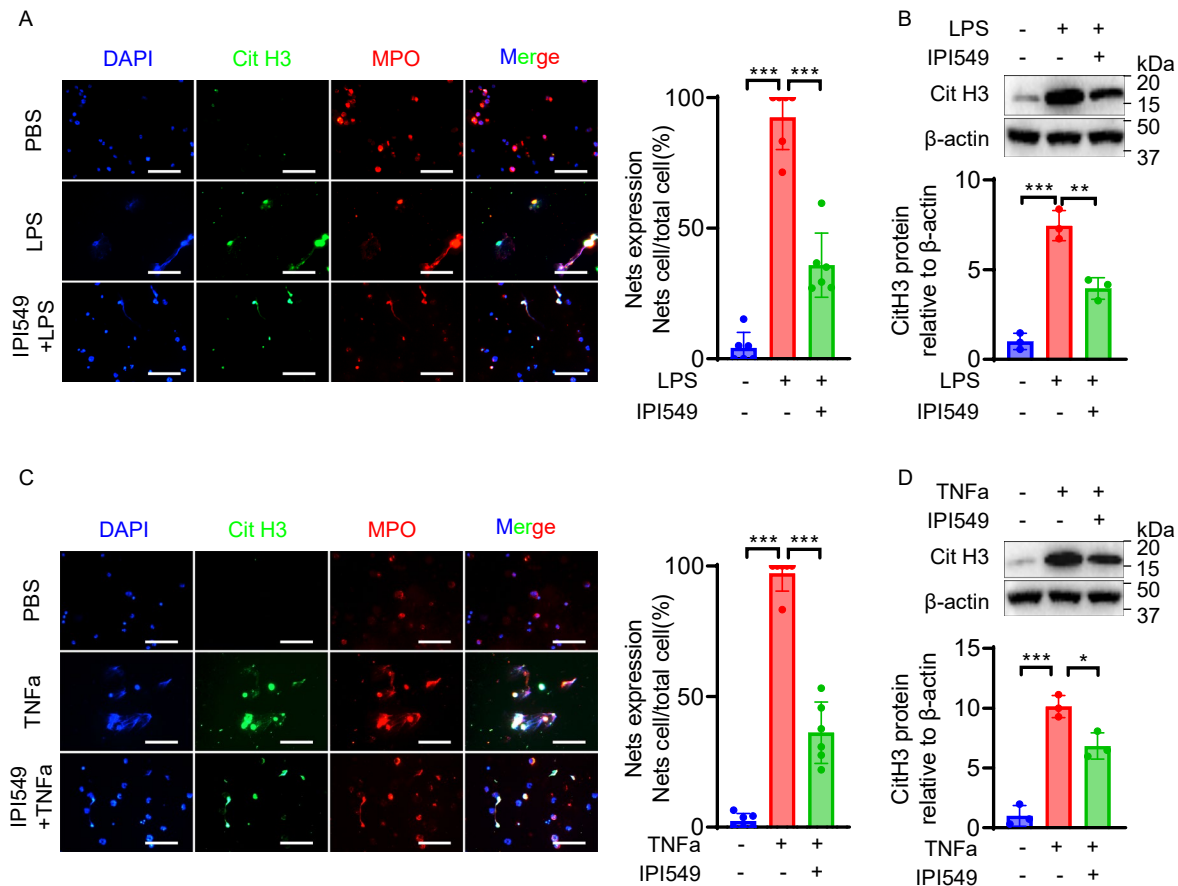

Figure S5

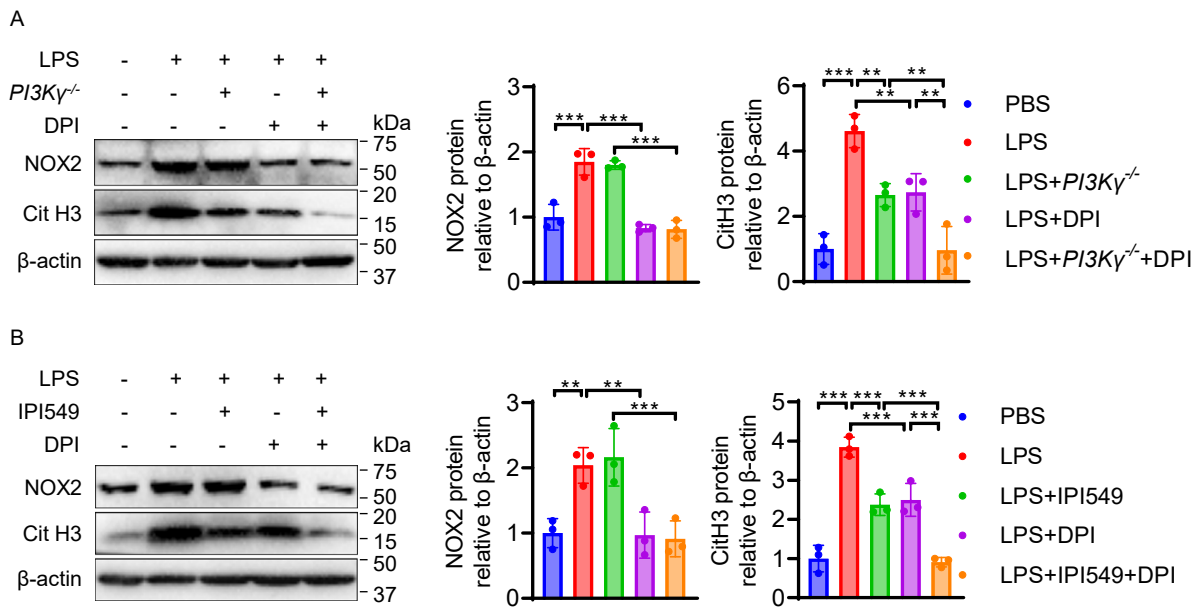

Figure S6

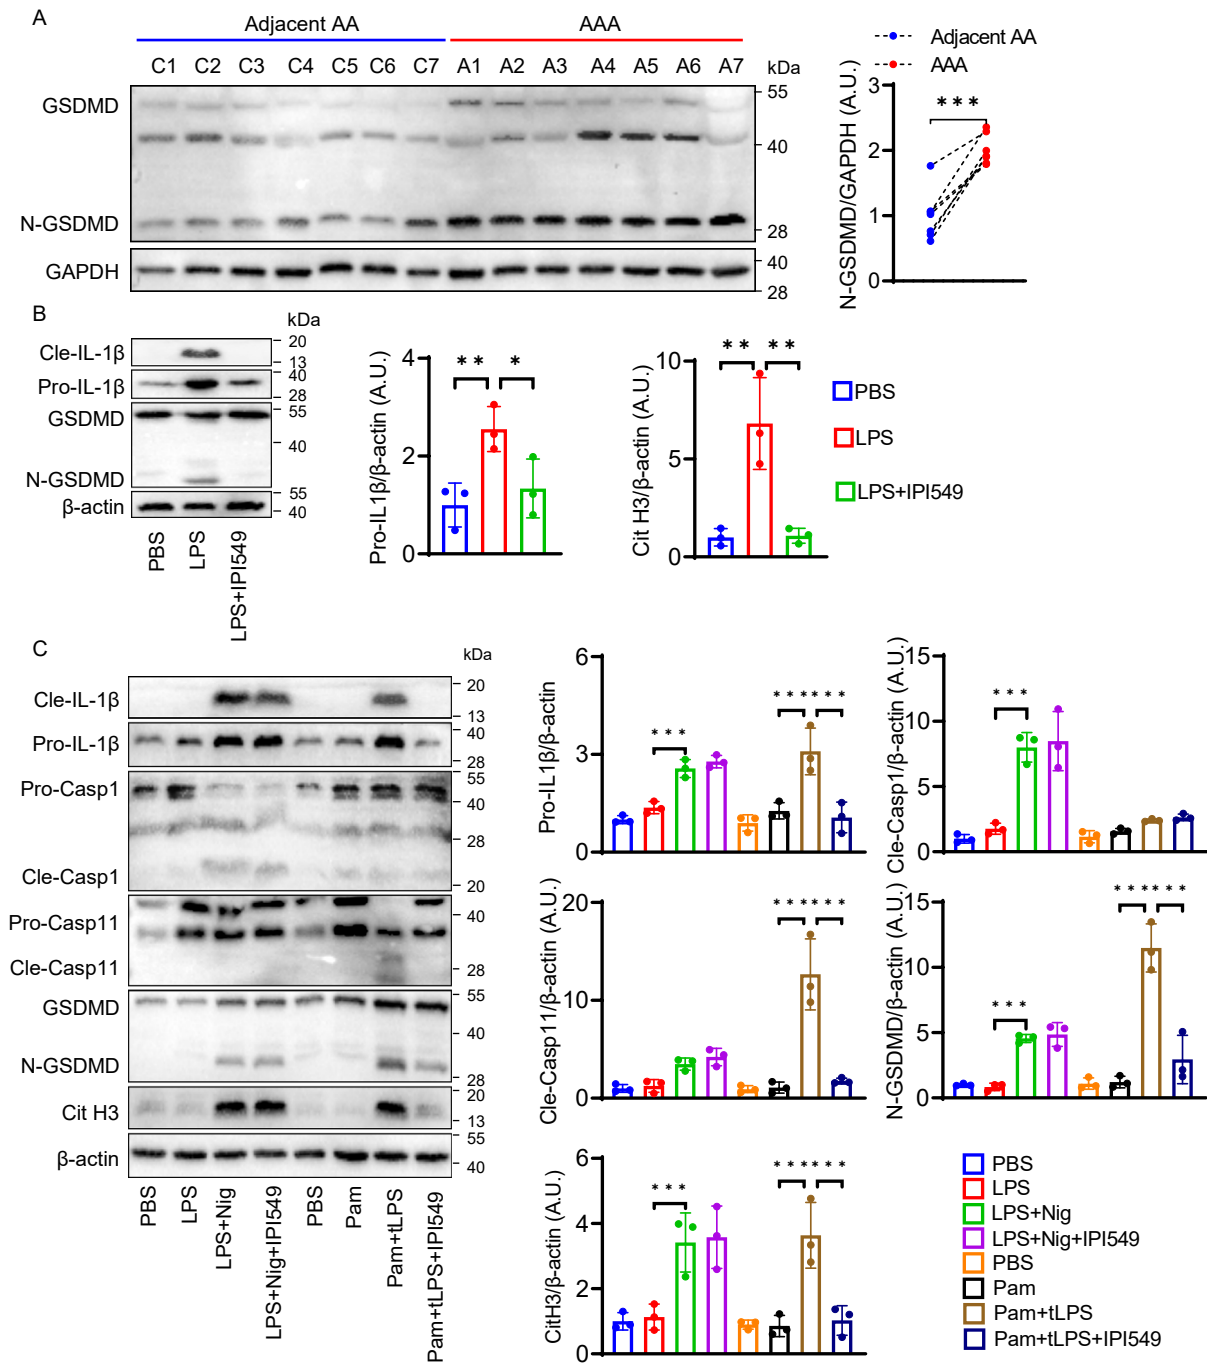

Figure S7

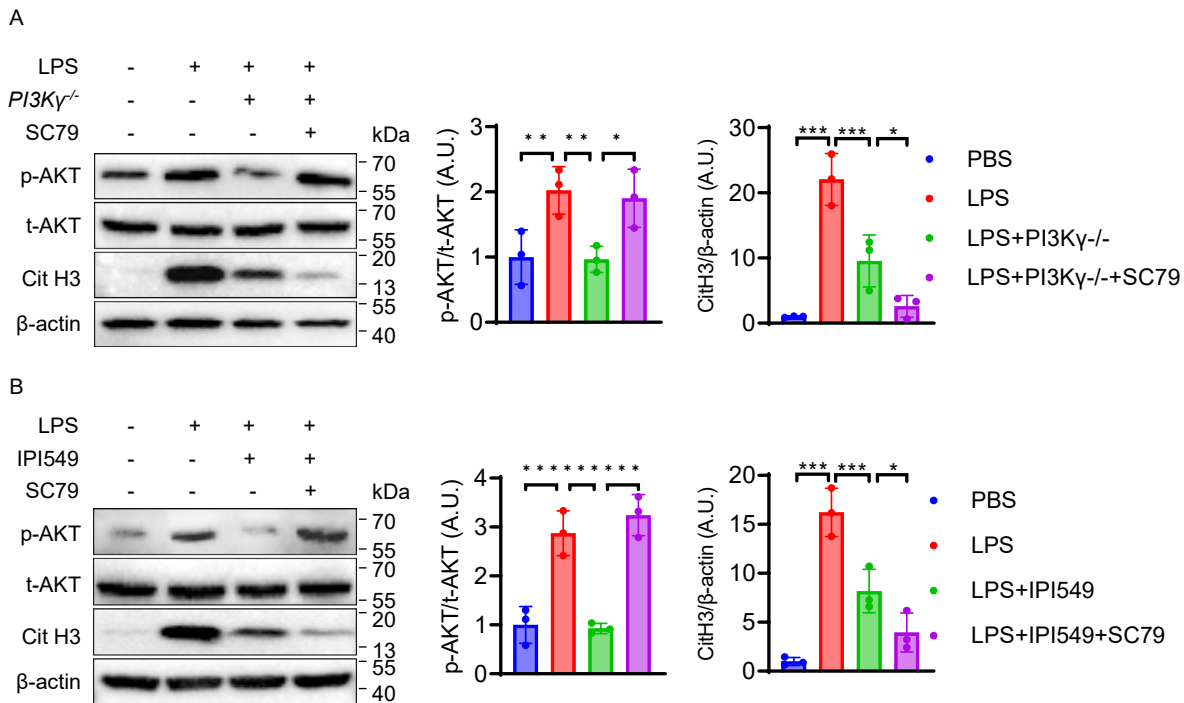

Figure S8

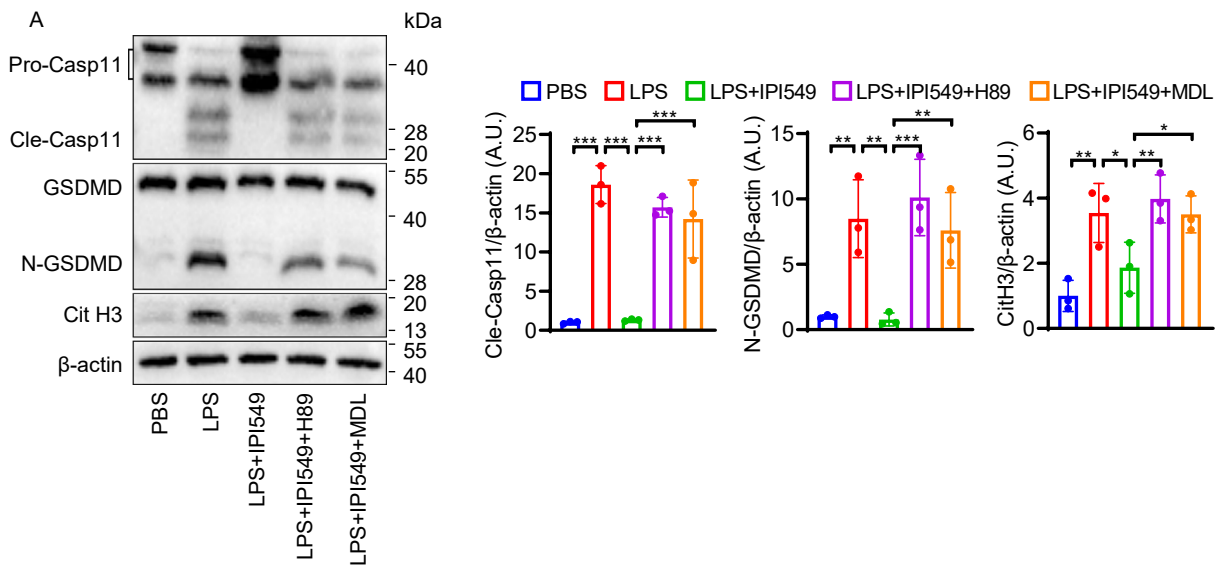

**B**

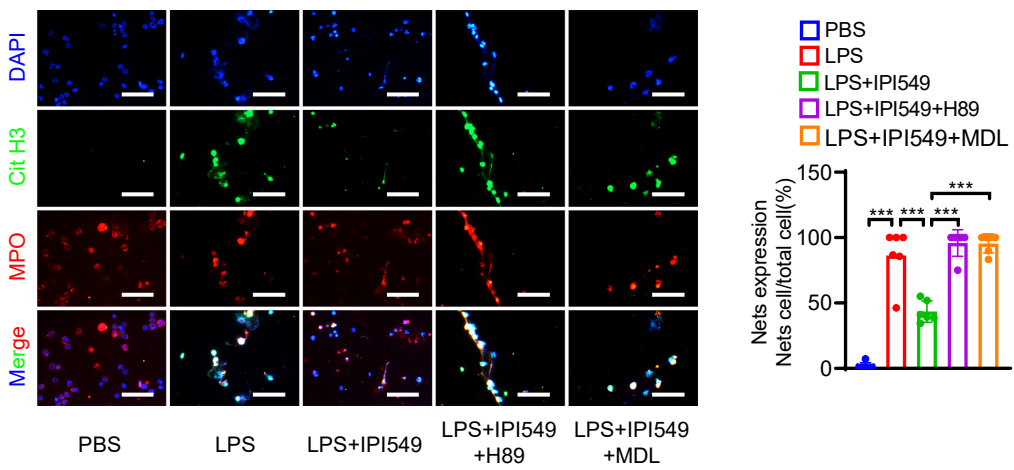

Supplement: jciinsight-9-183237-s117.pdf [file jciinsight-9-183237-s117.pdf]
